# Supplementary material for: FGFR inhibitor, AZD4547, impedes the stemness of mammary epithelial cells in the premalignant tissues of MMTV-ErbB2 transgenic mice
Source: PubMed Central journal article supplement (PMC5595825; doi:10.1038/s41598-017-11751-7), 2017-09-12

**FGFR inhibitor, AZD4547, impedes the stemness of mammary epithelial cells  
in the premalignant tissues of MMTV-ErbB2 transgenic mice**

**Qingxia Zhao<sup>1,2‡</sup>, Amanda B. Parris<sup>1‡</sup>, Erin W. Howard<sup>1</sup>, Ming Zhao<sup>1</sup>, Zhikun Ma<sup>1,3</sup>, Zhiying Guo<sup>1</sup>,  
Ying Xing<sup>2</sup>, Xiaohe Yang<sup>1,3\*</sup>**

<sup>1</sup>Julius L. Chambers Biomedical/Biotechnology Research Institute, Department of Biological and Biomedical Sciences, North Carolina Central University, North Carolina Research Campus, Kannapolis, North Carolina

<sup>2</sup>Basic Medical College of Zhengzhou University, Zhengzhou, Henan, P.R. China

<sup>3</sup>College of Medicine, Henan University of Sciences and Technology, Luoyang, P.R. China

\*xyang@ncu.edu

‡Authors contributed equally to this work

## Supplementary Figure Legends

**Supplementary Figure S1: Inhibition of cell proliferation induced by the FGFR inhibitors, BGJ398 and SU5402, in ErbB2-overexpressing breast cancer cells *in vitro*.** MDA-MB-361, BT474, and SKBR3 ErbB2-overexpressing breast cancer cells were treated with BGJ398 (0, 0.1, 0.3, 1, 3, or 10  $\mu\text{M}$ ) or SU5402 (0, 0.1, 0.3, 1, 3, or 10  $\mu\text{M}$ ) for 5 days. Then the viable fraction of each cell line was determined with an MTS assay. The  $\text{IC}_{50}$  values of BGJ398 and SU5402 are indicated for each cell line.

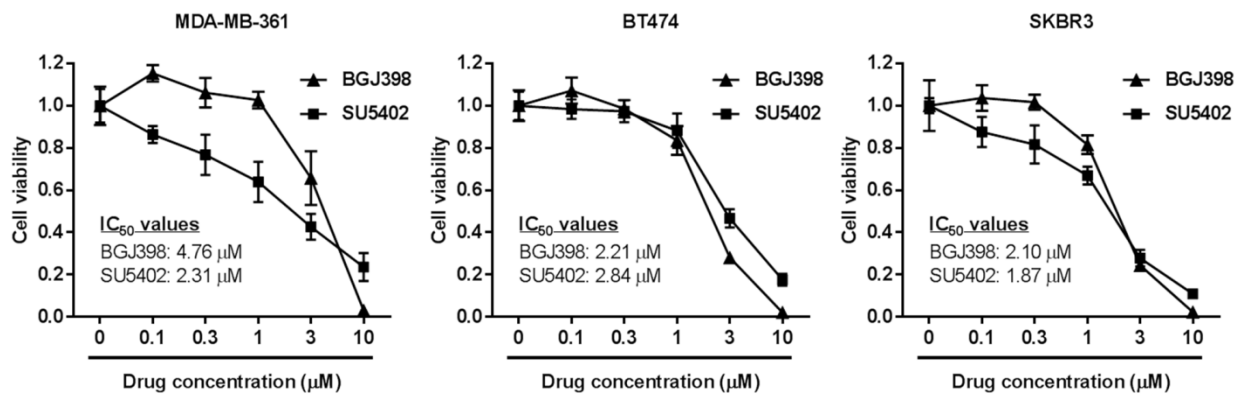

**Supplementary Figure S2: AZD4547 reduces the luminal and basal epithelial cell layer thickness of the mammary ducts.** The ductal epithelial thickness was compared in control and AZD4547 (2 or 6 mg/kg/day)-treated MMTV-ErbB2 mice. Using IF, the tissues were stained with K8/K18 (a) luminal epithelial markers and K14 (b) and SMA (c) basal epithelial markers (200× total magnification).

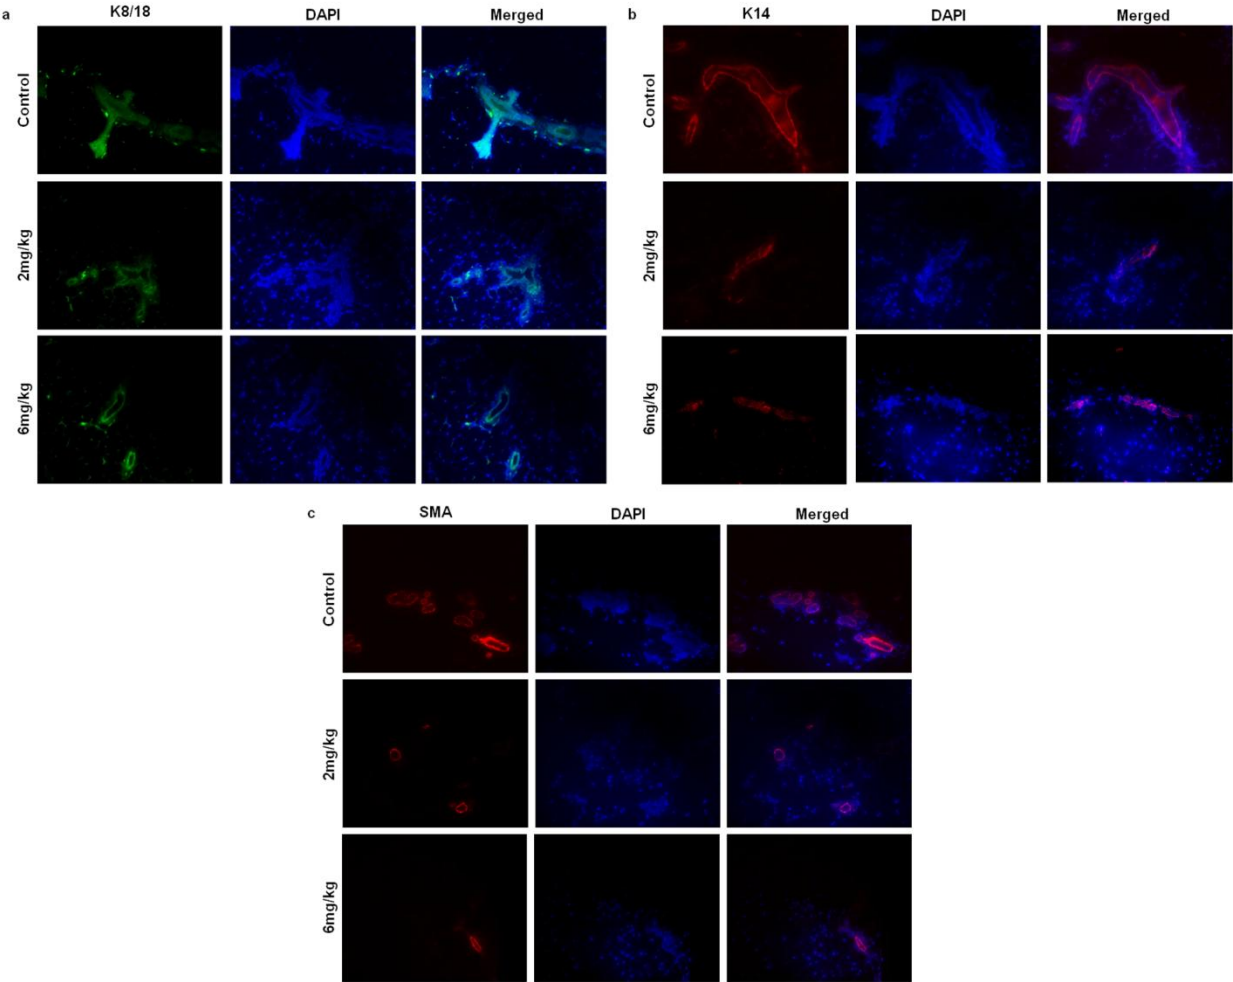

**Supplementary Figure S3: AZD4547 suppresses 4EBP1 and p70S6K activation/phosphorylation.**

The expression and phosphorylation of indicated proteins were analyzed from mammary tissues of control and AZD4547 (6 mg/kg/day for 10 weeks)-treated MMTV-ErbB2 mice using IHC. Brown staining indicates the presence of the specific protein.

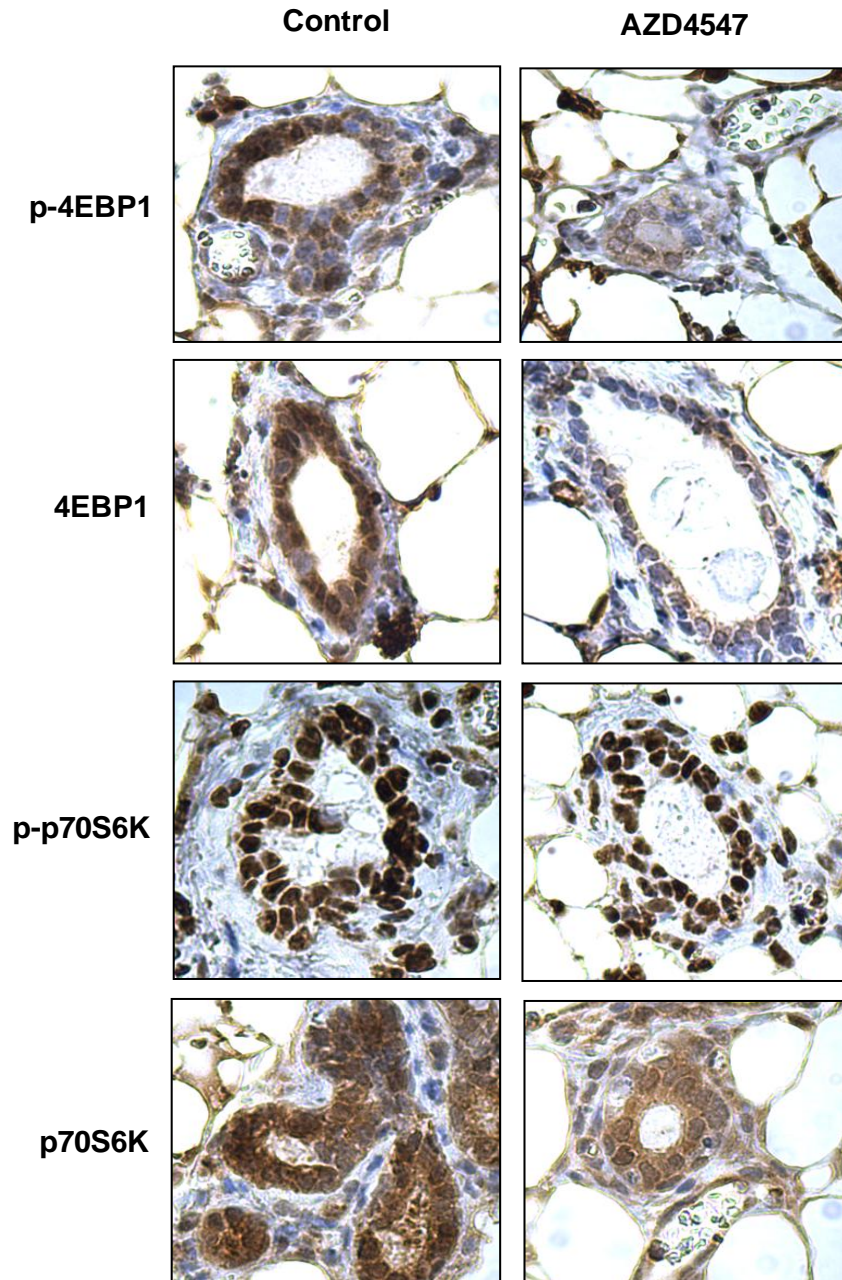

Supplement: 41598_2017_11751_MOESM1_ESM.pdf [file 41598_2017_11751_MOESM1_ESM.pdf]
